# Supplementary material for: Urine-Derived Kidney Progenitor Cells in Cystinosis
Source: MDPI journal article supplement (doi:10.3390/cells11071245), 2022-04-06

## **SUPPLEMENTARY MATERIALS**

## **TABLE OF CONTENTS**

**Supplementary Table S1:** Control healthy subjects recruited in the study

**Supplementary Table S2:** Clinical characteristics of the cystinosis patient whose native kidney specimen was analyzed.

**Supplementary Table S3:** Antibodies used in western blot, IF & ICH stains.

**Supplementary Table S4:** Primers used to test steady-state mRNA level via qPCR.

**Supplementary Figure S1:** Protocol of the quantification of undifferentiated cells in urine of cystinosis patients compared with healthy control subjects.

**Supplementary Figure S2:** Protocol of the isolation, characterization and establishment of Cys-uKPC clones, Cys-uKPC-PTEC and Cys-uKPC-Podo from urine of cystinosis patients.

**Supplementary Figure S3:** Correlation between the number of undifferentiated cells voided in urine of cystinosis patients and age, proteinuria (protein/creatinine ratio), kidney function (eGFR), white blood cell cystine level (WBC cystine; nmol  $\frac{1}{2}$  cystine/mg protein) and cystinosis genotype at the moment of quantification.

**Supplementary Figure S4:** Immunofluorescence staining for synaptopodin (SYNPO) and podocalyxin (PODXL) in Cys-uKPC-Podocytes. Immunofluorescence pictures of individual color channels (Synaptopodin or Podocalyxin: red; Phalloidin: green; DAPI: blue) are provided in order to better discriminate the individual signals.

**Supplementary Figure S5:** Control stainings for CD133 and PAX2 as markers of kidney progenitor cells.

**Supplementary Figure S6:** A kidney progenitor cell niche expressing CD133<sup>+</sup>/PAX2<sup>+</sup> is present *in situ* in cystinosis kidney

**Supplementary Figure S7:** Graphical representation and validation of the SIN lentiviral vector constructs used in the transduction experiments for complementation of *CTNS* cDNA.

**Supplementary Figure S8:** Confirmation of protein expression of CTNS-3HA in Cys-uKPC #1 LV\_CTNS-3HA and Cys-uKPC #7 LV\_CTNS-3HA.

**Supplementary Table S1:** Control healthy subjects recruited in the study

| <b>Control</b> | <b>Age</b><br>(years) | <b>Sex</b> | <b>Urine protein/creatinine</b><br>(g/g creatinine) |
|----------------|-----------------------|------------|-----------------------------------------------------|
| 1              | 8                     | F          | 0.23                                                |
| 2              | 5                     | F          | 0.14                                                |
| 3              | 5                     | M          | 0.2                                                 |
| 4              | 10                    | M          | 0.1                                                 |
| 5              | 7                     | F          | 0.09                                                |
| 6              | 8                     | F          | 0.14                                                |
| 7              | 4                     | F          | 0.19                                                |
| 8              | 6                     | F          | 0.11                                                |
| 9              | 12                    | F          | 0.1                                                 |

**Supplementary Table S2:** Clinical characteristics of the cystinosis patient whose native kidney specimen was analyzed.

|                                            |                                                                          |
|--------------------------------------------|--------------------------------------------------------------------------|
| Sex                                        | M                                                                        |
| Genetic background                         | Hom c992Gins                                                             |
| Age at start hemodialysis (yo)             | 8                                                                        |
| Age at kidney transplantation (yo)         | 8                                                                        |
| Source of kidney specimen                  | Nephrectomy of native kidney<br>2 months after kidney<br>transplantation |
| Indication for nephrectomy                 | Persistent renal Fanconi<br>syndrome after transplantation               |
| Proteinuria prior to<br>nephrectomy (mg/l) | 830                                                                      |

**Supplementary Table S3: Antibodies used in western blot, IF & ICH stainings**

| Name                                                         | Target | Manufacturer              | Catalog #  | Dilution        |
|--------------------------------------------------------------|--------|---------------------------|------------|-----------------|
| <b>Immunofluorescence staining</b>                           |        |                           |            |                 |
| <i>Primary antibodies</i>                                    |        |                           |            |                 |
| mouse anti-synaptopodin                                      | SYNPO  | Progen Biotechnik         | 65294      | 1:100           |
| rabbit anti-podocalyxin (C-terminal)                         | PODXL  | Abcam®                    | Ab154305   | 1:1000          |
| mouse anti-HA.11 epitope tag                                 | HA.11  | BioLegend®                | 901515     | 1:1000          |
| rabbit anti-LAMP-1                                           | LAMP-1 | Cell Signaling Tech       | #9091      | 1:200           |
| <i>Secondary antibodies</i>                                  |        |                           |            |                 |
| donkey anti-mouse IgG H&L Alexa Fluor® 555                   |        | Abcam®                    | Ab150106   | 1:300           |
| goat anti-rabbit IgG Alexa Fluor® 546                        |        | Invitrogen™ Thermo Fisher | A11035     | 1:400           |
| <b>Western Blot</b>                                          |        |                           |            |                 |
| <i>Primary antibodies</i>                                    |        |                           |            |                 |
| rabbit anti-aquaporin 1                                      | AQP1   | Novus Biologicals         | NBP1-84488 | 1:1000          |
| mouse anti-synaptopodin                                      | SYNPO  | Santa Cruz                | Sc-515842  | 1:500           |
| rabbit anti-podocalyxin                                      | PODXL  | Abcam®                    | Ab154305   | 1:500-1:1000    |
| mouse anti-Beta Actin                                        | ACTB   | Merck Sigma               | A5441      | 1:10.000        |
| rabbit anti-Beta Actin                                       | ACTB   | Cell Signaling Tech       | 4970S      | 1:1000          |
| rabbit anti-GAPDH                                            | GAPDH  | Abcam®                    | Ab9485     | 1:2000          |
| <i>Secondary antibodies</i>                                  |        |                           |            |                 |
| goat anti-rabbit IgG horseradish peroxidase-conjugated (HRP) |        | Agilent Dako              | P0448      | 1:2000-1:10.000 |
| goat anti-mouse IgG horseradish peroxidase-conjugated (HRP)  |        | Dako                      | P0447      | 1:2000          |
| <b>Immunohistochemistry</b>                                  |        |                           |            |                 |
| <i>Primary antibodies</i>                                    |        |                           |            |                 |
| rabbit anti-PAX2                                             | PAX2   | Abcam®                    | Ab79389    | 1:250           |
| mouse anti-CD133                                             | CD133  | Thermo Fisher             | MA1-219    | 1:100           |
| <i>Secondary antibodies</i>                                  |        |                           |            |                 |
| goat anti-rabbit IgG (H+L) Alexa Fluor® 546                  |        | Invitrogen™               | A11035     | 1:400-1:500     |
| goat anti-mouse IgG H&L Alexa Fluor® 488                     |        | Abcam®                    | Ab150113   | 1:300-1:500     |

**Supplementary Table S4:** Primers used to test steady-state mRNA level via qPCR

| Target gene                                     | Gene ID | Protein                                                                         | Forward primer (5'-3')  | Reverse primer (5'-3')   |
|-------------------------------------------------|---------|---------------------------------------------------------------------------------|-------------------------|--------------------------|
| <i>ACTB</i>                                     | 60      | $\beta$ -Actin                                                                  | AAGAGCTACGAGCTGCCTGA    | GACTCCATGCCCAGGAAGG      |
| <i>CTNS</i>                                     | 1497    | cystinosin                                                                      | CCACAGGCCTACATGAACTT    | TCCACTGGTCGTTGTTGTAG     |
| <b>Kidney stem/progenitor cell markers</b>      |         |                                                                                 |                         |                          |
| <i>NCAM1</i>                                    | 4684    | Neural cell adhesion molecule 1                                                 | GTCCTGCTCCTGGTGGTTGT    | TGACCGCAATGCACATGAA      |
| <i>CITED1</i>                                   | 4435    | Cbp/p300 interacting transactivator with Glu/Asp rich carboxy-terminal domain 1 | AGGATGCCAACCAAGAGATG    | TGGTTCCATTTGAGGCTACC     |
| <i>VIM</i>                                      | 7431    | vimentin                                                                        | ACACCCTGCAATCTTTCAGACA  | GATTCCACTTTGCGTTCAAGGT   |
| <i>PAX2</i>                                     | 5076    | paired box 2                                                                    | AACGACAGAACCCGACTATG    | ATCCCACTGGGTCATTGGAG     |
| <b>Proximal tubular epithelial cell markers</b> |         |                                                                                 |                         |                          |
| <i>ABCB1</i>                                    | 5243    | ATP binding cassette subfamily B member 1; MDR-1; P-gp                          | AGCTTAACACCCGACTTACAGA  | ACCTCTTCAGCTACTGCTCCAGCT |
| <i>AQP1</i>                                     | 358     | Aquaporin 1                                                                     | ATCGAGATCATCGGGACCCTCCA | TGTCGTCGGCATCCAGGTCATA   |
| <b>Podocyte markers</b>                         |         |                                                                                 |                         |                          |
| <i>SYNPO</i>                                    | 11346   | synaptopodin                                                                    | AGCCCAAGGTGACCCCGAAT    | CCCTGTCACGAGGTGCTGGC     |
| <i>PODXL</i>                                    | 5420    | podocalyxin                                                                     | CTTGAGACACAGACACAGAG    | CCGTATGCCGCACTTATC       |
| <i>WT1</i>                                      | 7490    | Wilm's tumor protein 1                                                          | GGACAGAAGGGCAGAGCAACCA  | GTCTCAGATGCCGACCGTACAA   |

**Supplementary Figure S1:** Protocol of the quantification of undifferentiated cells in urine of cystinosis patients compared with healthy control subjects. **Panel A:** Establishment of a calibration curve of known numbers of vimentin-positive renal papilla cells. Known numbers of renal papilla cells (1, 5, 10, 50, 100, 300, 500, 1000 cells per well) were seeded using fluorescence activated cell sorting (FACS) in a 96-well plate. cDNA was synthesized and pre-amplified according to the protocol of Picelli et al. qPCR was performed and the resulting Ct value for Beta-actin and vimentin for each known number of renal papilla cells, was used to establish a calibration curve for the total number of cells voided in urine (Ct value for Beta-actin), and the number of undifferentiated cells voided in urine respectively (Ct value for vimentin). **Panel B:** Quantification of number of undifferentiated cells in urine of a cystinosis patient or healthy control subject ('progenituria'). A freshly voided urine sample was collected and a cell pellet acquired via centrifugation. cDNA was synthesized and pre-amplified according to the protocol of Picelli et al. qPCR was performed and the resulting Ct value for Beta-actin and vimentin for each urine sample, was plotted against the established calibration curve for defining the total number of cells voided in urine and the number of undifferentiated cells.



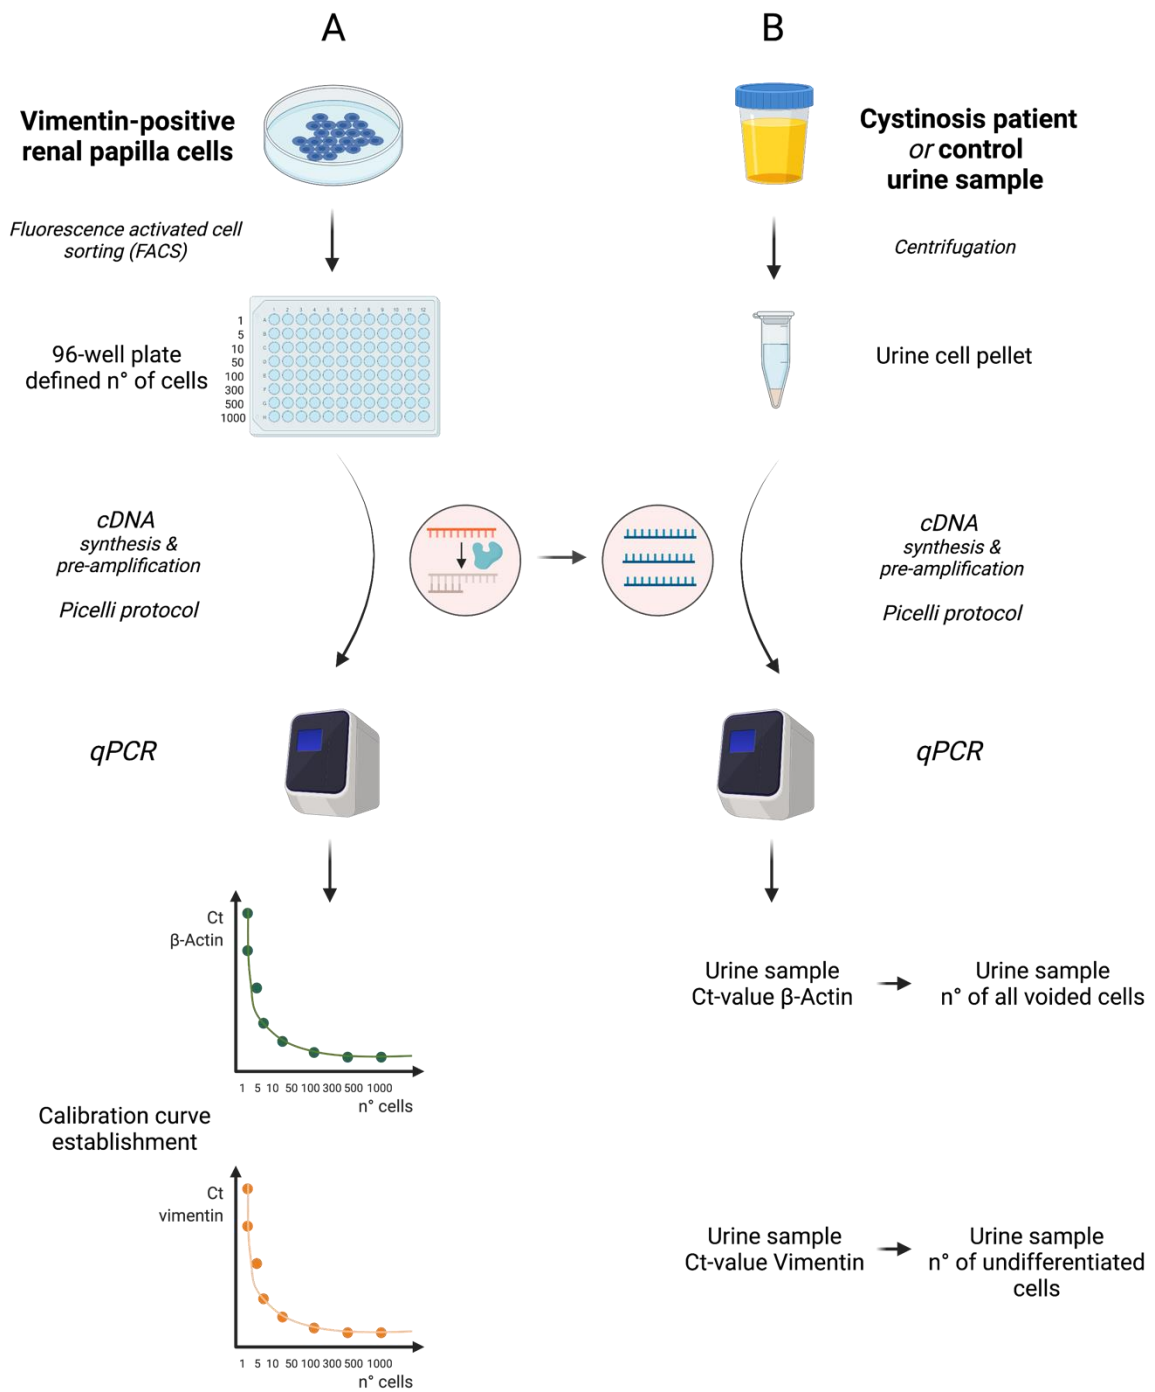

**Supplementary Figure S2:** Protocol of the isolation, characterization and establishment of Cys-uKPC clones, Cys-uKPC-PTEC and Cys-uKPC-Podo from urine of cystinosis patients.

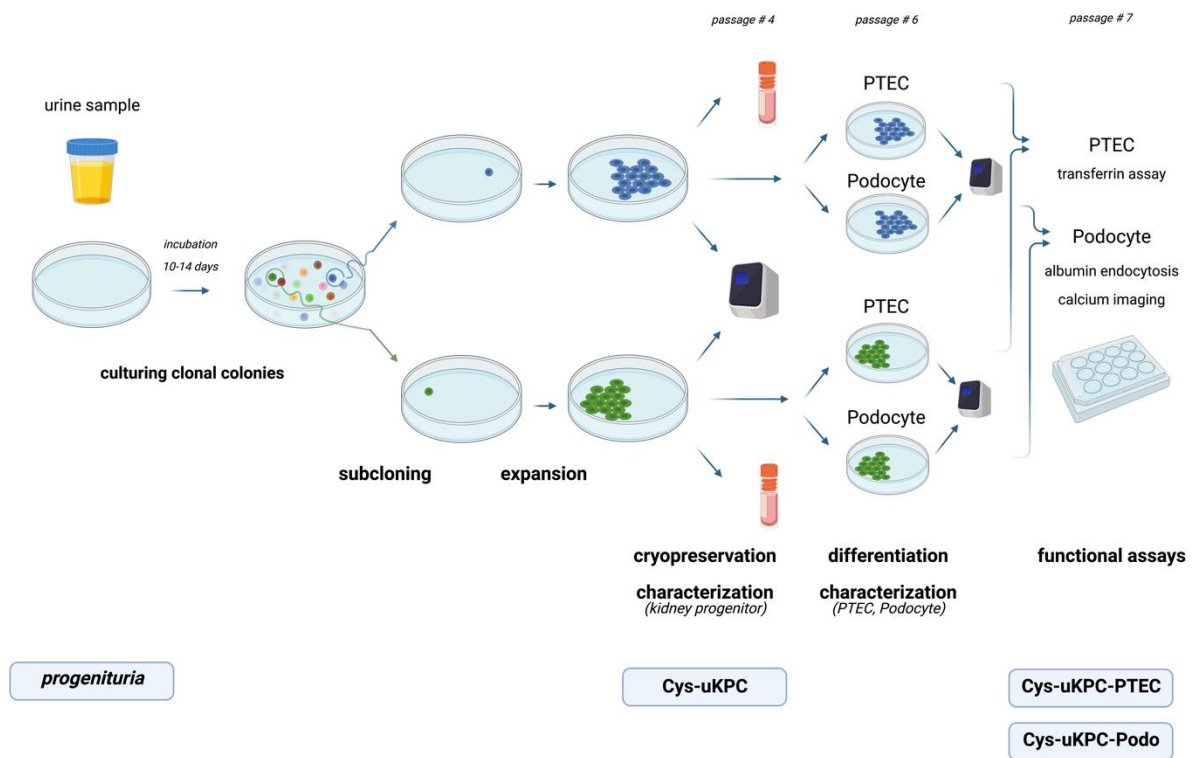

**Supplementary Figure S3:** Correlation between the number of undifferentiated cells voided in urine of cystinosis patients, and age, proteinuria (protein/creatinine ratio; g/g creatinine), kidney function (eGFR; ml/min/1.73m<sup>2</sup>), white blood cell cystine level (WBC cystine; nmol ½ cystine/mg protein) and cystinosis genotype at the moment of quantification. No correlation could be demonstrated with any parameter.

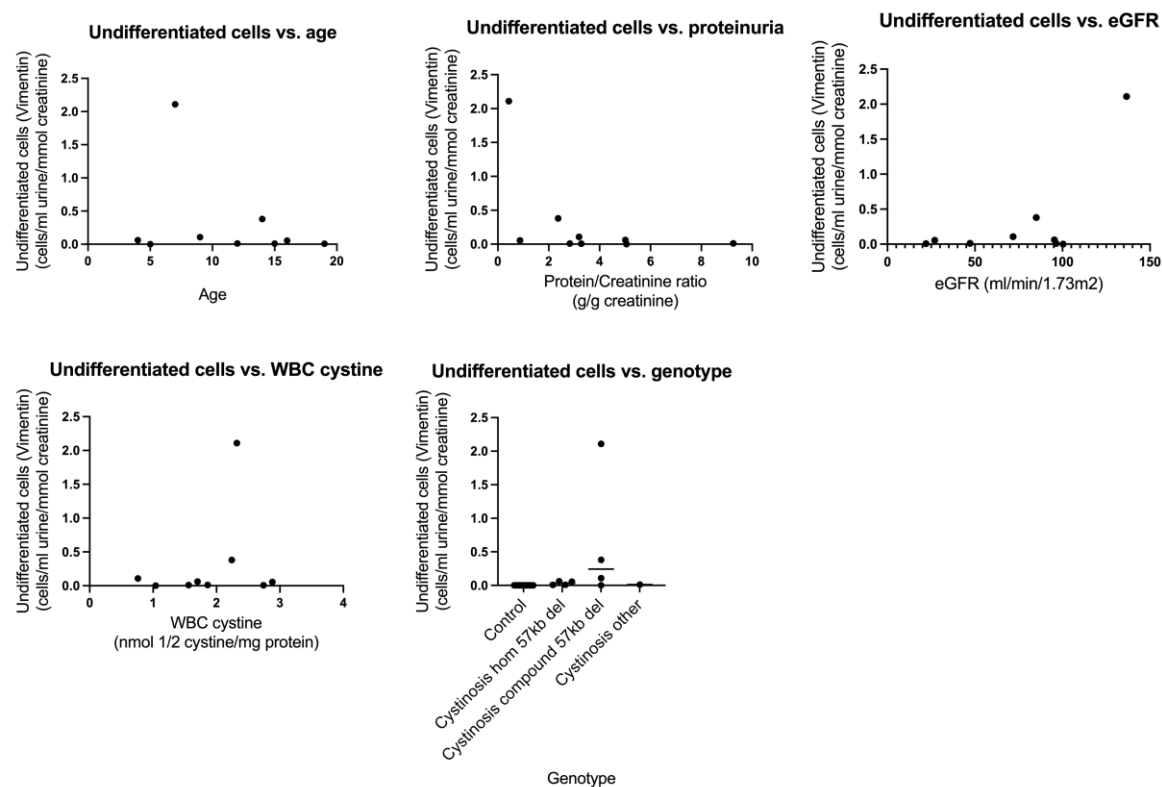

**Supplementary Figure S4:** Immunofluorescence staining for synaptopodin (SYNPO) and podocalyxin (PODXL) in Cys-uKPC-Podocytes. Immunofluorescence pictures of individual color channels (Synaptopodin or Podocalyxin: red; Phalloidin: green; DAPI: blue) are provided in order to better discriminate the individual signals.

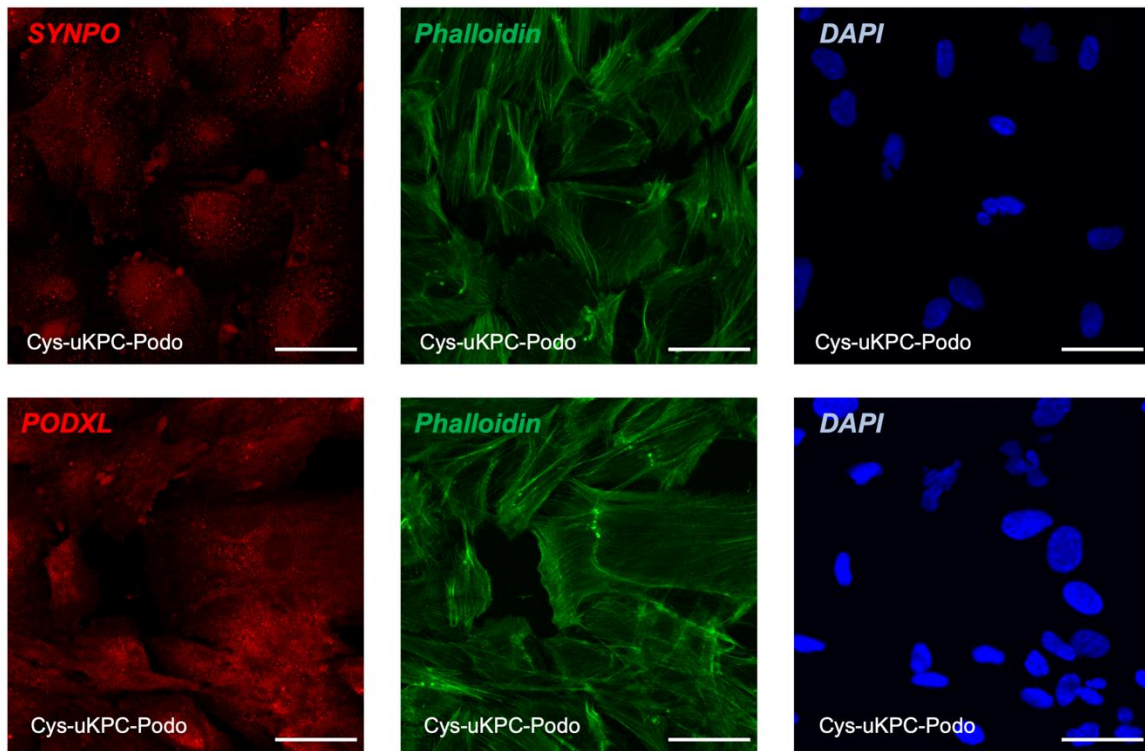

**Supplementary Figure S5:** Control stainings for CD133 and PAX2 as markers of kidney progenitor cells. **Panel A & B:** Positive control for immunohistochemistry (A) and immunofluorescence staining (B) for PAX2 in healthy fetal kidney tissue (28 weeks gestational age) demonstrates a strong presence of PAX2 at the superficial nephrogenic rim, in contrast to regions of differentiated cells. Scale bar panel A: 200  $\mu\text{m}$ ; scale bar panel B: 50  $\mu\text{m}$ .

**Panel C & D:** Positive control immunohistochemistry for CD133 of an adult transplant kidney in a 13-year old recipient, demonstrating cytoplasmic positivity in epithelial cells of the Bowman's capsule and tubular epithelial cells, of which in some the apical border is strongly positive. Scale bar panel C: 25  $\mu\text{m}$ ; scale bar panel D: 50  $\mu\text{m}$ . **Panel E:** Positive control for immunofluorescence staining for CD133 in the context of acute tubular injury, showing positivity at the apical border of tubular epithelial cells. Scale bar: 50  $\mu\text{m}$ . **Panel F:** Control immunofluorescence co-staining for CD133 and PAX2 in a kidney tissue specimen of minimal changes disease-type nephrotic syndrome shows no signal for either marker. Scale bar: 50  $\mu\text{m}$ .

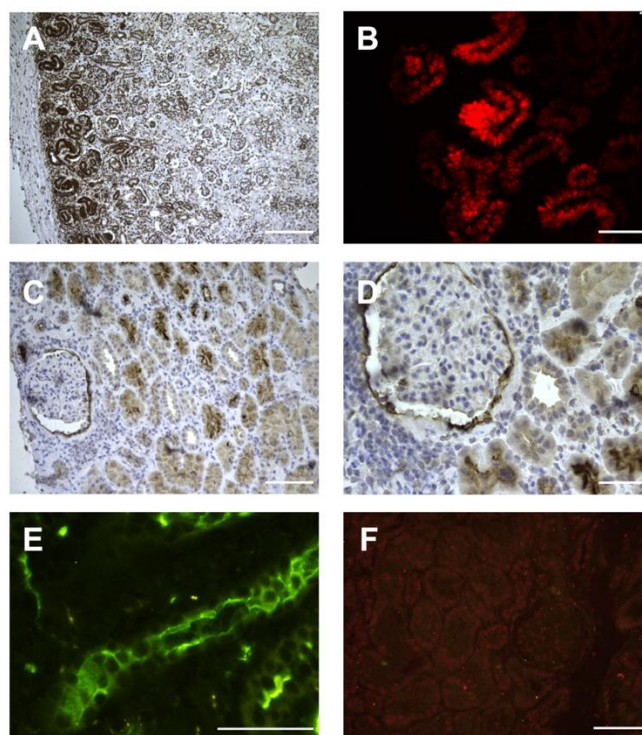

**Supplementary Figure S6: A kidney progenitor cell niche expressing CD133<sup>+</sup>/PAX2<sup>+</sup> is present *in situ* in cystinosis kidney**

**Panel A & B:** Immunofluorescence co-staining for CD133 (green) and PAX2 (red) in tissue specimens of the native kidney of a nephropathic cystinosis patient, showing focal co-expression in cells scattered throughout the tubular epithelium (full white arrows in panel A, B) and the parietal epithelial cells of the Bowman's capsule (dashed white arrows in panel A). Scale bar: 50  $\mu$ m.

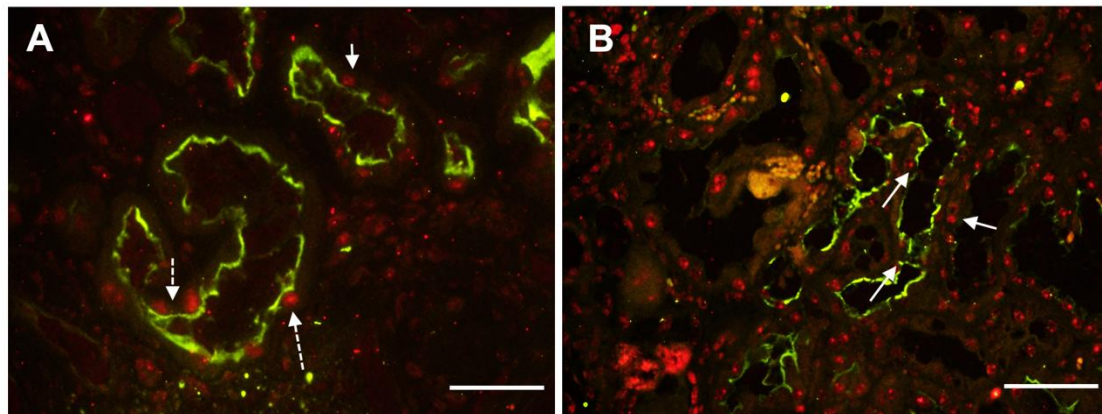

**Supplementary Figure S7:** Graphical representation and validation of the SIN lentiviral vector (LV) constructs used in the transduction experiments for complementation of *CTNS*.

**Panel A:** Graphical representation of the second-generation SIN lentiviral vector transfer plasmid construct used to generate viral vectors for the transduction experiments to complement Cys-uKPCs with *CTNS* cDNA or *eGFP* as control. SIN-lentiviral vector expressing 3HA-tagged *CTNS* cDNA driven from an EF1a promoter, together with a puromycin resistance selection cassette. **Panel B:** Validation of CTNS-3HA expressing LVs; detection of the 3HA tag (green) in fibroblasts expressing the CTNS-3HA construct upon transduction with the CTNS-3HA LV. **Panel C:** LAMP1 staining (red) visualizing the late-endosomal/lysosomal compartments. **Panel D:** Merge of the 3HA signal with the LAMP1 signal indicating that the punctated signal of the CTNS-3HA corresponds to a lysosomal staining pattern. **Panel E:** WB detecting the CTNS-3HA or vinculin (equal loading) upon transduction of fibroblasts. Migration pattern of CTNS-3HA correspond to the glycosylated version of the CTNS protein. NT = Not transduced; LV = lentiviral vector.



A

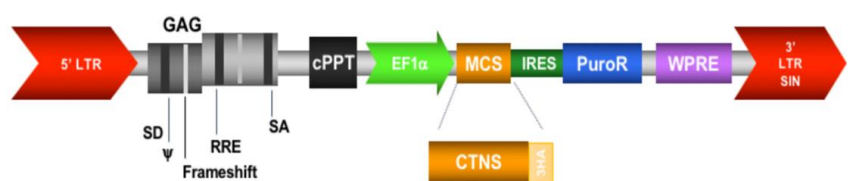

B

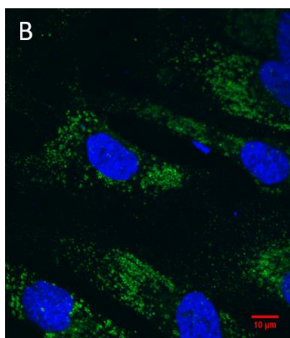

C

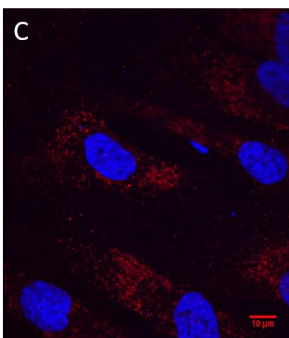

D

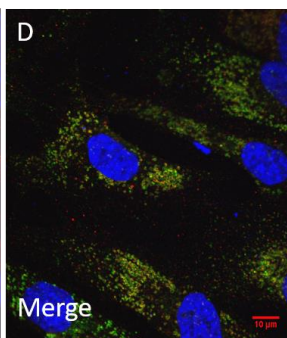

E

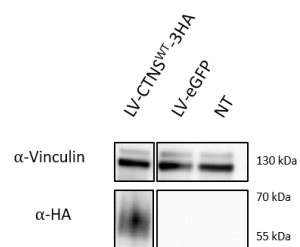



**Supplementary Figure S8:** Confirmation of protein expression of CTNS-3HA in Cys-uKPC #1 LV\_CTNS-3HA and Cys-uKPC #7 LV\_CTNS-3HA. Western Blot for 3HA-tagged CTNS in the stable CTNS-3HA expressing Cys-uKPC #1 LV\_CTNS-3HA (panel A) and Cys-uKPC #7 LV\_CTNS-3HA (panel B), compared to GAPDH as housekeeping protein, and the eGFP expressing vehicle controls Cys-uKPC #1 LV\_eGFP and Cys-uKPC #7 LV\_eGFP. Neonatal kidney stem progenitor cells (nKSPC) and the non-transduced Cys-uKPCs (Cys-uKPC #1 and Cys-uKPC #7) were also taken along as controls.

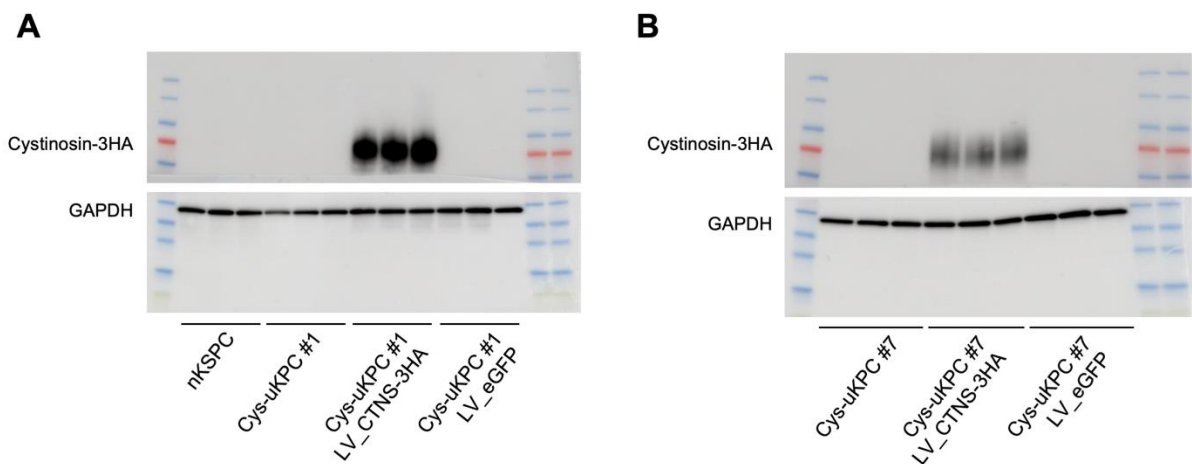

Supplement: s1 [file s1]
